# Supplementary material
Source: Springer Nature journal article supplement (https://www.springermedizin.de/resource/supplementary/12967_2013_1727_MOESM5_ESM.pdf/9575140)

Doubling time (hours) for MSC6

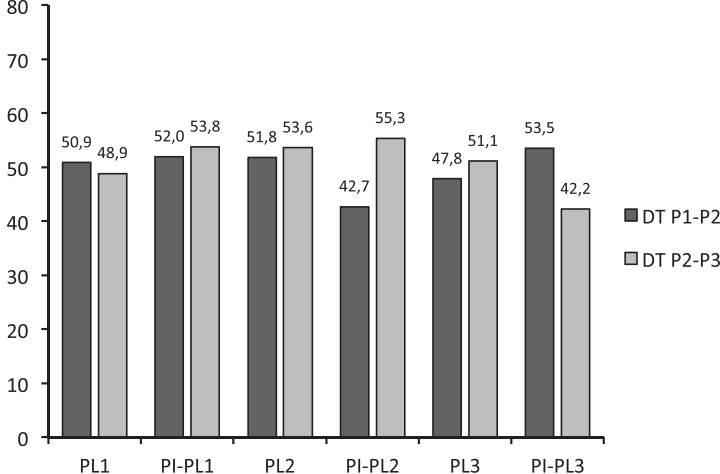

$p=0.765$  at Chi-square for multiple dependent variables

Supplement: MOESM5 [file 9575140]
